# Supplementary material
Source: publisher figshare collection journal article supplement (https://sage.figshare.com/ndownloader/files/12534800)
Supplement: Supplementary file 1 [file 12534800]

| Study              | Diagnostic test             | Reference standard for infection                                                                                                                                                                                                                                                                                                                                                                          | No of cases | Outcome                                                                                                                                                                             |
|--------------------|-----------------------------|-----------------------------------------------------------------------------------------------------------------------------------------------------------------------------------------------------------------------------------------------------------------------------------------------------------------------------------------------------------------------------------------------------------|-------------|-------------------------------------------------------------------------------------------------------------------------------------------------------------------------------------|
| Dilisio (2014)     | Arthroscopic tissue culture | Positive samples at time of revision surgery                                                                                                                                                                                                                                                                                                                                                              | 19          | Arthroscopic biopsy showed 100% sensitivity and specificity when compared to samples taken at revision. Glenohumeral aspiration showed sensitivity of 16.7% and specificity of 100% |
| Frangiamore (2015) | Synovial IL-6               | Infection classification was divided into 4 groups: (1) definite (At least 1 positive preoperative or intraoperative) finding of infection and >1 positive intraoperative culture or □ 1 positive preoperative (aspirate) culture and 1 positive intraoperative culture); (2) probable (>1 positive intraoperative culture and negative preoperative or intraoperative) findings □ or At least 1 positive | 32          | Based on ROC analysis cut-off of 359.3 pg/mL: Sensitivity 87%, specificity 90%, positive LR 8.45; negative LR 0.15                                                                  |

|                    |                         |                                                                                                                                                                                                                                                                                                                                                                                                                                                                                                                                                                                                               |    |                                                                       |
|--------------------|-------------------------|---------------------------------------------------------------------------------------------------------------------------------------------------------------------------------------------------------------------------------------------------------------------------------------------------------------------------------------------------------------------------------------------------------------------------------------------------------------------------------------------------------------------------------------------------------------------------------------------------------------|----|-----------------------------------------------------------------------|
|                    |                         | preoperative or intraoperative finding and 1 positive culture□), (3) possible (Negative preoperative or intraoperative) finding and 1 positive intraoperative culture□) (4) no infection (All negative cultures (tissue or aspirate) and no preoperative or intraoperative findings of infection).                                                                                                                                                                                                                                                                                                            |    |                                                                       |
| Frangiamore (2015) | Synovial Alpha-defensin | Infection classification was divided into 4 groups: (1) definite (At least 1 positive preoperative or intraoperative) finding of infection and >1 positive intraoperative culture or □ 1 positive preoperative (aspirate) culture and 1 positive intraoperative culture); (2) probable (>1 positive intraoperative culture and negative preoperative or intraoperative) findings□ or At least 1 positive preoperative or intraoperative finding and 1 positive culture), (3) possible (Negative preoperative or intraoperative) finding and 1 positive intraoperative culture) (4) no infection (All negative | 33 | Sensitivity 63%, specificity 95%, positive LR 12.1, negative LR 0.38, |

|                    |                                                                                                                                   |                                                                                                                                                                                                                                                                                                                                                                                                                                                                                                                                                                                                                                                                                                                  |    |                                                                                                                                                                                                                                          |
|--------------------|-----------------------------------------------------------------------------------------------------------------------------------|------------------------------------------------------------------------------------------------------------------------------------------------------------------------------------------------------------------------------------------------------------------------------------------------------------------------------------------------------------------------------------------------------------------------------------------------------------------------------------------------------------------------------------------------------------------------------------------------------------------------------------------------------------------------------------------------------------------|----|------------------------------------------------------------------------------------------------------------------------------------------------------------------------------------------------------------------------------------------|
|                    |                                                                                                                                   | cultures (tissue or aspirate) and no preoperative or intraoperative findings of infection).                                                                                                                                                                                                                                                                                                                                                                                                                                                                                                                                                                                                                      |    |                                                                                                                                                                                                                                          |
| Frangiamore (2017) | Synovial fluid levels of 9 cytokines (interleukin [IL] 6, granulocyte-macrophage colony-stimulating factor, IL-1 $\beta$ , IL-12, | Infection classification was divided into 4 groups: (1) definite (At least 1 positive preoperative or intraoperative) finding of infection and >1 positive intraoperative culture or $\square$ 1 positive preoperative (aspirate) culture and 1 positive intraoperative culture); (2) probable (>1 positive intraoperative culture and negative preoperative or intraoperative) findings or At least 1 positive preoperative or intraoperative finding and 1 positive culture), (3) possible (Negative preoperative or intraoperative) finding and 1 positive intraoperative culture) (4) no infection (All negative cultures (tissue or aspirate) and no preoperative or intraoperative findings of infection). | 75 | Sensitivity/specificity: IL-6: 82%/87%; GM-CSF: 0.54/0.85; INF-gamma: 60%/80%; IL-1B: 71%/87%; IL-12: 36%/94%; IL-2: 54%/87%; IL-8: 71%/79%; IL-10: 72%/82%; TNF-alpha: 92%/33%.<br><br>Best combination IL-6 + TNF-alpha +IL-2: 80%/93% |

|                  |                                                                                               |                                                                                                                                                                                                                                                                                                                                                                                                                                                                                                                                            |    |                                                    |
|------------------|-----------------------------------------------------------------------------------------------|--------------------------------------------------------------------------------------------------------------------------------------------------------------------------------------------------------------------------------------------------------------------------------------------------------------------------------------------------------------------------------------------------------------------------------------------------------------------------------------------------------------------------------------------|----|----------------------------------------------------|
|                  | IL-2, IL-8,<br>interferon- $\gamma$ ,<br>IL-10, and<br>tumour<br>necrosis<br>factor- $\alpha$ |                                                                                                                                                                                                                                                                                                                                                                                                                                                                                                                                            |    |                                                    |
| Grosso<br>(2014) | Serum IL-6                                                                                    | Infection classification was divided into 4 groups: (1) definite (At least 1 positive preoperative or intraoperative) finding of infection and >1 positive intraoperative culture or 1 positive preoperative (aspirate) culture and 1 positive intraoperative culture); (2) probable (>1 positive intraoperative culture and negative preoperative or intraoperative) findings or at least 1 positive preoperative or intraoperative finding and 1 positive culture), (3) possible (Negative preoperative or intraoperative) finding and 1 | 69 | Overall sensitivity 12.5%, Overall specificity 93% |

|               |                             |                                                                                                                                                             |                                                |                                                                                                                                                                  |
|---------------|-----------------------------|-------------------------------------------------------------------------------------------------------------------------------------------------------------|------------------------------------------------|------------------------------------------------------------------------------------------------------------------------------------------------------------------|
|               |                             | positive intraoperative culture) (4) no infection (All negative cultures (tissue or aspirate) and no preoperative or intraoperative findings of infection). |                                                |                                                                                                                                                                  |
| Nelson (2015) | Synovial leukocyte esterase | MSIS criteria                                                                                                                                               | 85 (45 primary and 40 revision arthroplasties) | Ten revision patients met modified MSIS criteria for PJI. Sensitivity = 30%, specificity = 67%, Positive predictive value = 43%, Negative predictive value = 83% |

|                           |                                           |                                                                                                                                                                                                                                                                                                                                                                                                                                                                                                                                                                                                                                                                                                                                                                                                                                                                                                                                                                                                  |           |                                                                            |
|---------------------------|-------------------------------------------|--------------------------------------------------------------------------------------------------------------------------------------------------------------------------------------------------------------------------------------------------------------------------------------------------------------------------------------------------------------------------------------------------------------------------------------------------------------------------------------------------------------------------------------------------------------------------------------------------------------------------------------------------------------------------------------------------------------------------------------------------------------------------------------------------------------------------------------------------------------------------------------------------------------------------------------------------------------------------------------------------|-----------|----------------------------------------------------------------------------|
| <p>Tashjan<br/>(2017)</p> | <p>Pre-revision<br/>tissue<br/>biopsy</p> | <p>Definite infection: positive ESR or CRP result and &gt;1 positive culture (for biopsies —both obtained during the biopsy with the same bacteria; for revisions—both obtained during the re- vision with the same culture) or 1 positive revision culture and 1 positive culture of the same bacteria independent of the ESR or CRP result.</p> <p>Probable infection: positive ESR or CRP and 1 positive culture (for biopsies—the culture is from the biopsy; for revisions—the culture is from the revision with none of the biopsy cultures growing the same bacteria) or a negative ESR and CRP and &gt;1 positive culture (for biopsies—both obtained during the biopsy with the same bacteria; for revisions—both obtained during the re- vision with the same bacteria).</p> <p>No evidence of infection: negative ESR and CRP result and no positive cultures from the biopsy sample for the biopsy definition and no positive cultures from the revision sample for the revision</p> | <p>77</p> | <p>Pre-revision biopsy had a sensitivity of 90% and specificity of 86%</p> |
|---------------------------|-------------------------------------------|--------------------------------------------------------------------------------------------------------------------------------------------------------------------------------------------------------------------------------------------------------------------------------------------------------------------------------------------------------------------------------------------------------------------------------------------------------------------------------------------------------------------------------------------------------------------------------------------------------------------------------------------------------------------------------------------------------------------------------------------------------------------------------------------------------------------------------------------------------------------------------------------------------------------------------------------------------------------------------------------------|-----------|----------------------------------------------------------------------------|

|                    |                                   |                                                                                                                     |    |                                                                                                                                                                       |
|--------------------|-----------------------------------|---------------------------------------------------------------------------------------------------------------------|----|-----------------------------------------------------------------------------------------------------------------------------------------------------------------------|
|                    |                                   | definition.                                                                                                         |    |                                                                                                                                                                       |
| Villacis<br>(2014) | Serum<br>Interleukin-<br>6 (IL-6) | Definitive diagnosis of an infection was determined by growth of<br>bacteria on culture of intraoperative specimens | 34 | Normal serum IL-6 level defined<br>as <10 pg/mL: Sensitivity = 0.14,<br>specificity = 0.95, positive<br>predictive value = 0.67, negative<br>predictive value = 0.61, |
